# Supplementary material for: Molecular architectures of iron complexes for oxygen reduction catalysis—Activity enhancement by hydroxide ions coupling
Source: PubMed Central journal article supplement — Proc Natl Acad Sci U S A. 2024 Mar 4;121(11):e2316553121. doi: 10.1073/pnas.2316553121 (PMC10945836; doi:10.1073/pnas.2316553121), 2024-03-04
Supplement: pnas.2316553121.sapp.pdf [file pnas.2316553121.sapp.pdf]

**Supporting Information for**

**Molecular Architectures of Iron Complexes for Oxygen Reduction  
Catalysis - Activity Enhancement by Hydroxide Ions Coupling**

*Poe Ei Phyu Win,<sup>1</sup> Jiahui Yang,<sup>1</sup> Shuwang Ning,<sup>5</sup> Xiang Huang,<sup>3\*</sup> Gengtao Fu,<sup>5</sup> Qiming Sun,<sup>1,2</sup>  
Xing-Hua Xia,<sup>4\*</sup> Jiong Wang<sup>1,2\*</sup>*

<sup>1</sup>Innovation Center for Chemical Science, College of Chemistry, Chemical Engineering and  
Materials Science, Soochow University, Suzhou 215006, China

<sup>2</sup>Jiangsu Key Laboratory of Advanced Negative Carbon Technologies, Soochow University,  
Suzhou, 215123, Jiangsu, China

<sup>3</sup>Department of Physics, Southern University of Science and Technology, Shenzhen 518055,  
China

<sup>4</sup>State Key Laboratory of Analytical Chemistry for Life Science, School of Chemistry and  
Chemical Engineering, Nanjing University, Nanjing 210023, China

<sup>5</sup>Jiangsu Key Laboratory of New Power Batteries, Jiangsu Collaborative Innovation Center of  
Biomedical Functional Materials, School of Chemistry and Materials Science, Nanjing Normal  
University, Nanjing 210023, China

E-mail: [huangx8@sustech.edu.cn](mailto:huangx8@sustech.edu.cn) (X. H.); [xhxia@nju.edu.cn](mailto:xhxia@nju.edu.cn) (X. X.); [wangjiong@suda.edu.cn](mailto:wangjiong@suda.edu.cn)  
(J. W.)

## Experiments

**Synthesis of rGO.** Graphene oxide (GO) was synthesized using a modified Hummers' method. In brief, graphite powder (6 g) was mixed with potassium persulfate ( $K_2S_2O_8$ , 2 g) and phosphorus pentoxide ( $P_2O_5$ , 2 g) in 98 % sulfuric acid ( $H_2SO_4$ ) being heated at 80 °C for 10 h. Afterwards the product was continued to react with potassium permanganate ( $KMnO_4$ , 6 g) in 98 %  $H_2SO_4$  at 40 °C for 2 h, achieving GO. To obtain the reduced GO (rGO), the resultant GO was transferred into a Teflon lined stainless autoclave, and was heated at 150 °C for 3 h.

**Synthesis of FePc NTs-rGO.** Iron phthalocyanine nanotubes (FePc NTs) were synthesized by a simple hydrothermal method. A 5.76 mmol of phthalonitrile ( $C_8H_4N_2$ ), 1.44 mmol of iron(II) acetate tetrahydrate ( $C_4H_{14}FeO_8$ ), and 10 mg of ammonium heptamolybdate tetrahydrate ( $(NH_4)_6Mo_7O_{24}\cdot 4H_2O$ ) were put in ethylene glycol solvent and stirred for 30 min. The solution was poured into a 100 mL autoclave lined with Teflon, and the autoclave temperature was kept at 180 °C for 12 h. After naturally cooling to ambient temperature, the precipitate was accrued and further washed with hydrochloric acid (HCl) of 1.0 M concentration, hot water and ethanol for several times for the removal of residual reagents. The resultant FePc NTs were dried in a vacuum oven at 60 °C for 24 h. Secondly, the rGO (5 mg) was dispersed into *N, N*-dimethylformamide (DMF) containing FePc NTs (10 mg). The FePc NTs-rGO suspension was heated at 80 °C for 12 h. Then the suspension was centrifuged to remove free FePc NTs in DMF, and FePc NTs-rGO was washed with ethanol and dispersed in isopropanol (2 mg mL<sup>-1</sup>).

**Synthesis of FePc-rGO.** 10 mg of FePc was dissolved in DMF, and was mixed with 5 mg of rGO (dispersed in DMF) to be heated to 80 °C for 12 h. The resultant mixture was centrifuged to remove any free FePc remained in DMF. Then it was washed with ethanol to achieve FePc-rGO, and dispersed in isopropanol (2 mg mL<sup>-1</sup>).

**Synthesis of FePc Agg-rGO.** 10 mg of FePc powders and 5 mg of rGO powders were directly mixed using a mortar and pestle to thoroughly combine the two materials, and the resultant mixtures were directly dispersed in isopropanol (2 mg mL<sup>-1</sup>).

**Rotating ring-disk electrode (RRDE) measurements.** For the RRDE measurements, a glassy carbon (GC) disk (5.6 mm in diameter) and a Pt ring (0.9 mm in width) were applied as the working electrodes fixed on a rotating apparatus (PINE Company). The ORR electrochemical measurements were performed on a CHI 1140C potentiostat (CH Instrument Company) with a Hg/HgO electrode and a graphite rod as the reference and counter electrodes, respectively. Prior to electrochemical measurements, the GC disk and Pt ring electrodes were polished with 0.05  $\mu\text{m}$  alumina slurries. Then the electrodes were successively sonicated in ethanol and deionized water. Before the RRDE measurements, the Pt ring electrode was further electrochemically polished in 0.5 M  $\text{H}_2\text{SO}_4$  with continuous cyclic voltammetry scanning between -0.65 V to 0.9 V vs Hg/HgSO<sub>4</sub> until the polarization curves became highly repeatable. A 10  $\mu\text{L}$  of suspension (2 mg  $\text{mL}^{-1}$  samples dispersed in isopropanol) was cast on the GC disk and was later dropped Nafion solution (0.5 wt% in isopropanol) without contacting the Pt ring. The ink was dried slowly in air until a uniform catalyst distribution across the electrode surface was obtained. For comparison, the 20% Pt/C (the same loadings on GC disk as the cases of FePc based samples) was also electrochemically polished in 0.5 M  $\text{H}_2\text{SO}_4$  with continuous cyclic voltammetry scanning between -0.65 V to 0.9 V vs Hg/HgSO<sub>4</sub> until the polarization curves became highly repeatable before the RRDE measurements. Then the electrolyte was changed into 0.1 M KOH purged with O<sub>2</sub> for conducting the ORR measurement. The selectivity of producing HO<sub>2</sub><sup>-</sup>(%) and the electron transfer number (*n*) were determined by the following equations S-1 and S-2,

$$HO_2^- (\%) = 200 \times \frac{I_r/N}{I_d+I_r/N} \quad (\text{S-1})$$

$$n = 4 \times \frac{I_d}{I_d+I_r/N} \quad (\text{S-2})$$

where  $I_d$  is disk current,  $I_r$  is ring current and  $N$  is current collection efficiency of the Pt ring.

**Zinc-air battery.** To approach the practical use, we assembled the liquid zinc-air battery using FePc NTs-rGO as the cathode catalyst. The liquid zinc-air battery tests were operated in a homemade zinc-air cell. The electrocatalyst ink was prepared by mixing 10 mg of electrocatalysts and of 250  $\mu\text{L}$  solution, in which 250  $\mu\text{L}$  of solution was prepared by mixing 100  $\mu\text{L}$  of deionized water, 100  $\mu\text{L}$  of methanol, and 50  $\mu\text{L}$  of Nafion. The air cathode consists of porous carbon paper with a gas diffusion layer (GDL) loaded with FePc NTs-rGO or commercial Pt/C catalyst. The anode consisted of a 0.3 mm zinc plate. The electrolyte for the zinc-air battery was 0.2 M  $\text{ZnCl}_2$

contained in 6 M KOH solution. The battery test for open-circuit voltage (OCV) and power density was performed on a CHI 760E potentiostat.

***In situ* electrochemical Raman measurements.** The measurements were conducted on a commercial three-electrode electrochemical cell with one quartz window filling 0.1 M KOH with continuously purging O<sub>2</sub>. An Ag/AgCl wire (soaked in saturated KCl solution) and carbon rod were used as the reference electrode and counter electrode, respectively. A glassy carbon plate coated with the catalyst was used as the working electrode. The acquisition time was set to 60 s with 638 nm laser (25% of power density). Each spectral data was accumulated twice.

#### Calculation of TOFs.

$$TOF = i_k / (4 \times F \times m) \quad (\text{S-3})$$

where  $i_k$  is the kinetic ORR current derived from the Koutecky-Levich analysis;  $F$  is the Faraday constant;  $m$  is the Fe content on the electrode surface, which was determined by the ICP measurement.

#### Laviron equation.

$$E_c = E_{1/2} - \left(\frac{RT}{\alpha nF}\right) \times \ln\left(\frac{\alpha nF}{RTk_s}\right) - \left(\frac{RT}{\alpha nF}\right) \times \ln(v) \quad (\text{S-4})$$

where  $E_c$  is the reduction potential of metal redox,  $E_{1/2}$  is the formal potential of metal redox,  $R$  is the universal gas constant,  $T$  is the temperature in kelvin,  $n$  is the number of electrons transferred,  $\alpha$  is the transfer coefficient,  $k_s$  is the kinetic constant of metal redox, and  $v$  is the scan rate in the CV measurement.

**Computational method.** Spin-polarized density functional theory calculations were performed at the generalized gradient approximation with the grid-based projector augmented wave (GPAW)<sup>1</sup> code and atomic simulation environment (ASE)<sup>2</sup>. The electronic wavefunctions were represented on a uniform real-spaced grid with a spacing of 0.2 Å, and the Fermi smearing width was set to 0.1 eV. The exchange-correlation and van der Waals contributions are considered using the BEEF-vdW functional.<sup>3</sup> For the structure optimization, we utilized an orthorhombic cell with vacuum layers of ~15 Å. The Brillouin zone is sampled at the Gamma point. All the atoms were relaxed

until the force on each atom was less than 0.05 eV/Å. The reaction energy of an electrochemical step containing coupled proton and electron pair was calculated using the computational hydrogen electrode (CHE) model.<sup>4</sup> The entropy and zero-point energy corrections are used to evaluate the Gibbs free energy.<sup>5</sup> In addition, to account for the solvation effect, \*OH and \*OOH are stabilized by -0.15 eV due to the hydrogen bonding with water.<sup>6</sup>

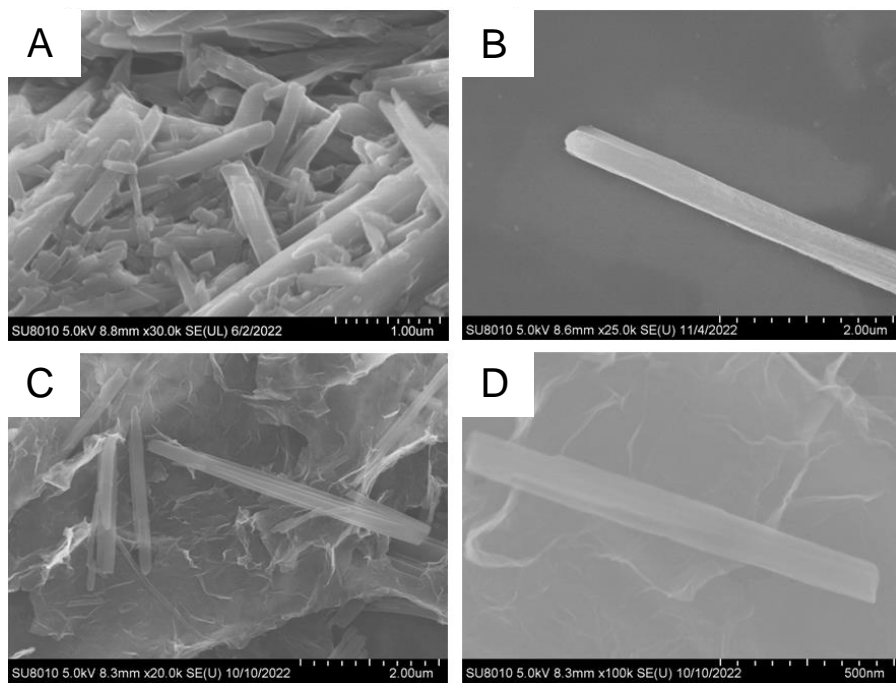

**Fig. S1.** SEM images of FePc NTs (A, B) and FePc NTs-rGO (C, D) at different resolutions.

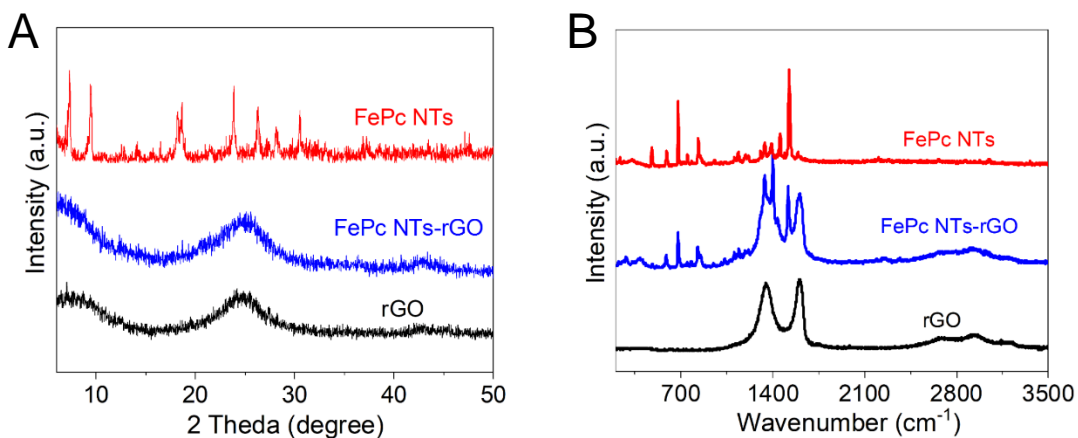

**Fig. S2.** XRD patterns (A) and Raman spectra (B) of rGO, FePc NTs and FePc NTs-rGO.

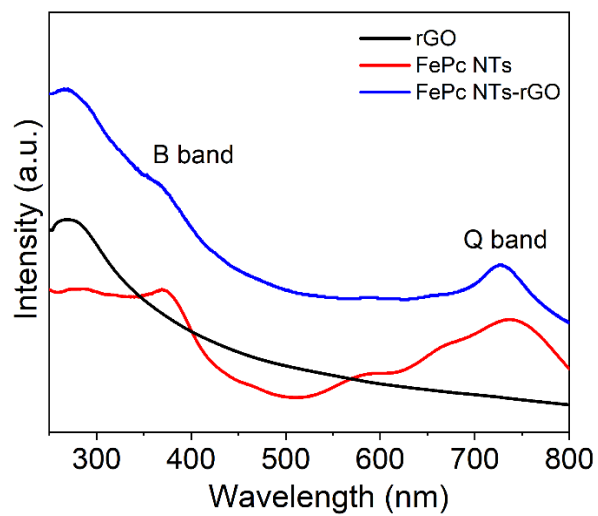

**Fig. S3.** UV-vis spectra of FePc NTs and FePc NTs-rGO. The pristine rGO is included as background. The UV-vis data were collected in DMF.

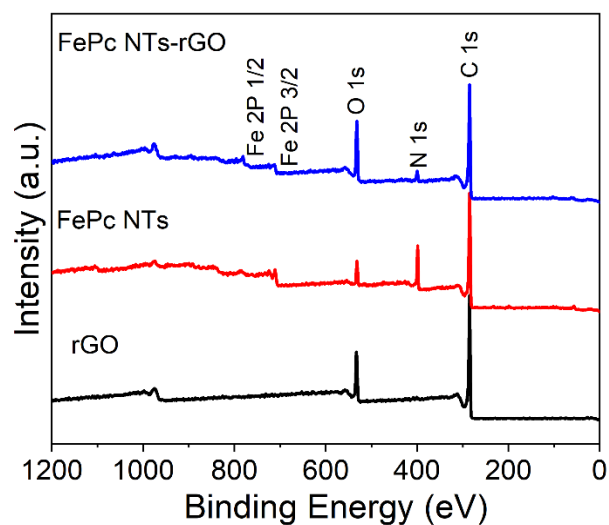

**Fig. S4.** XPS full elemental surveys of rGO, FePc NTs and FePc NTs-rGO.

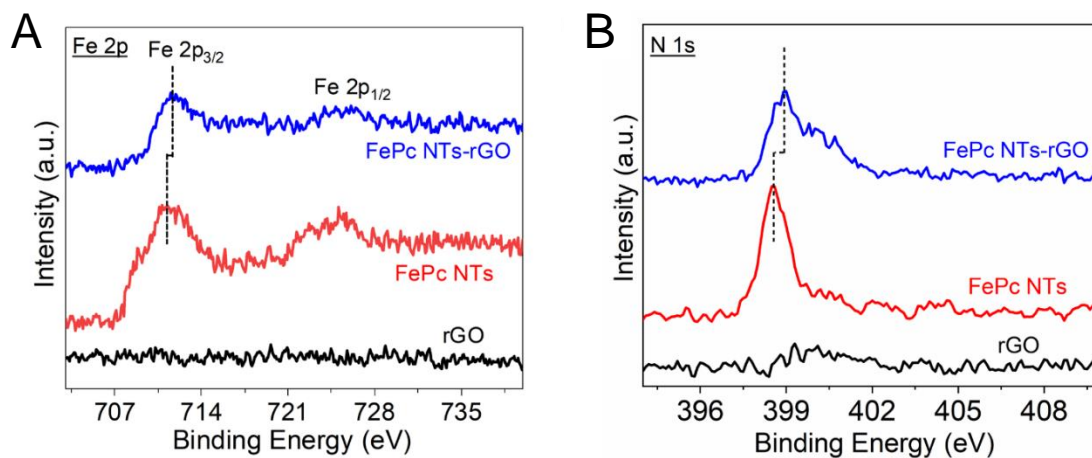

**Fig. S5.** XPS surveys of Fe 2*p* (A) and N 1*s* (B) core electron levels of FePc NTs and FePc NTs-rGO. The pristine rGO is included as background.



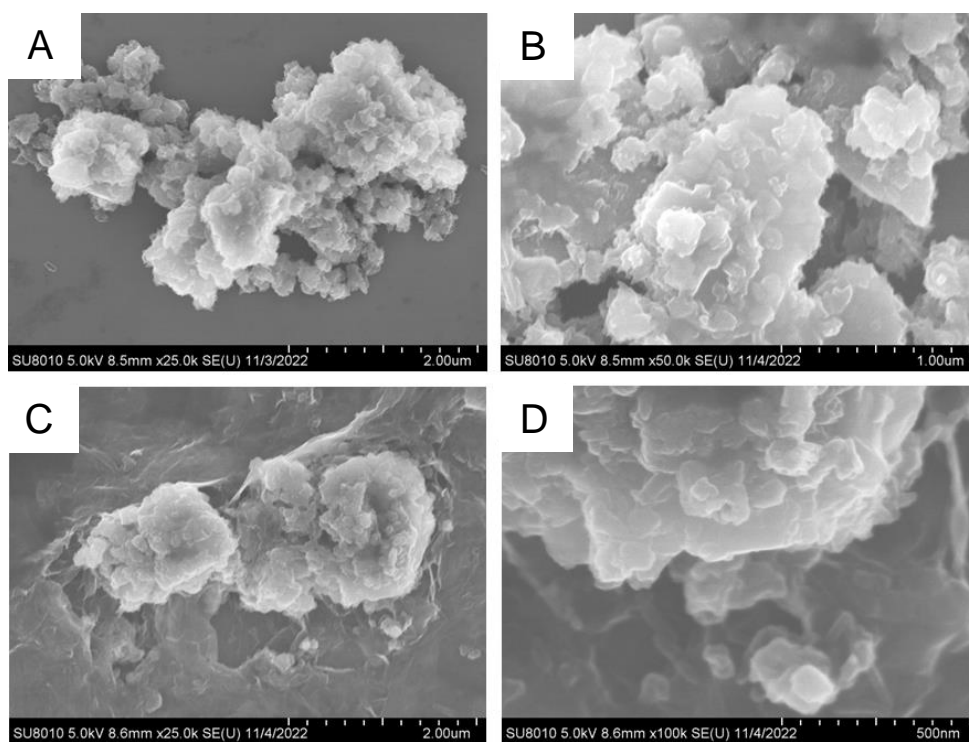

**Fig. S6.** SEM images of FePc Agg (A, B) and FePc Agg-rGO (C, D) at different resolutions.

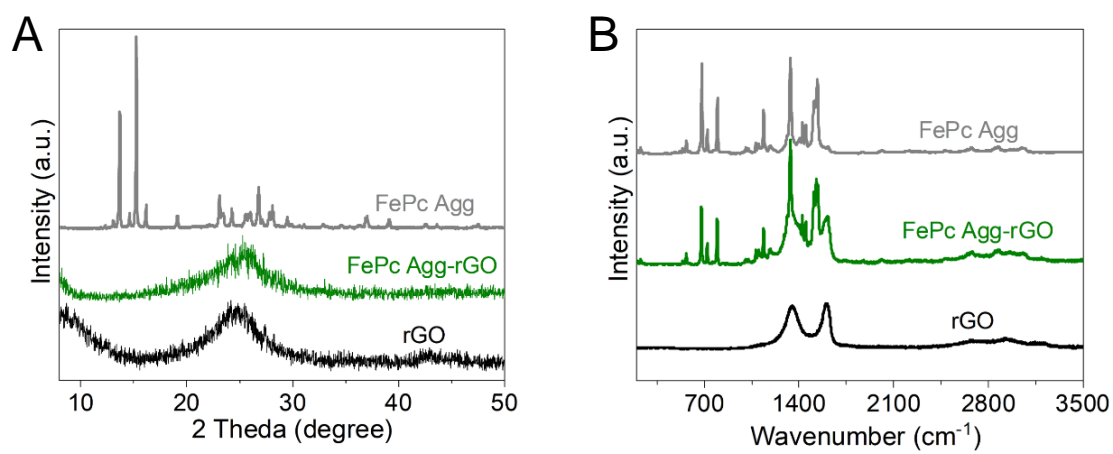

**Fig. S7.** XRD patterns (A) and Raman spectra (B) of rGO, FePc Agg and FePc Agg-rGO.

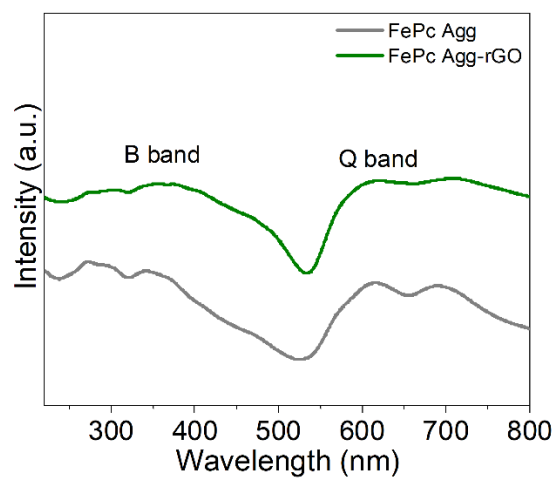

**Fig. S8.** UV-vis spectra of FePc Agg and FePc Agg-rGO conducted in isopropanol.

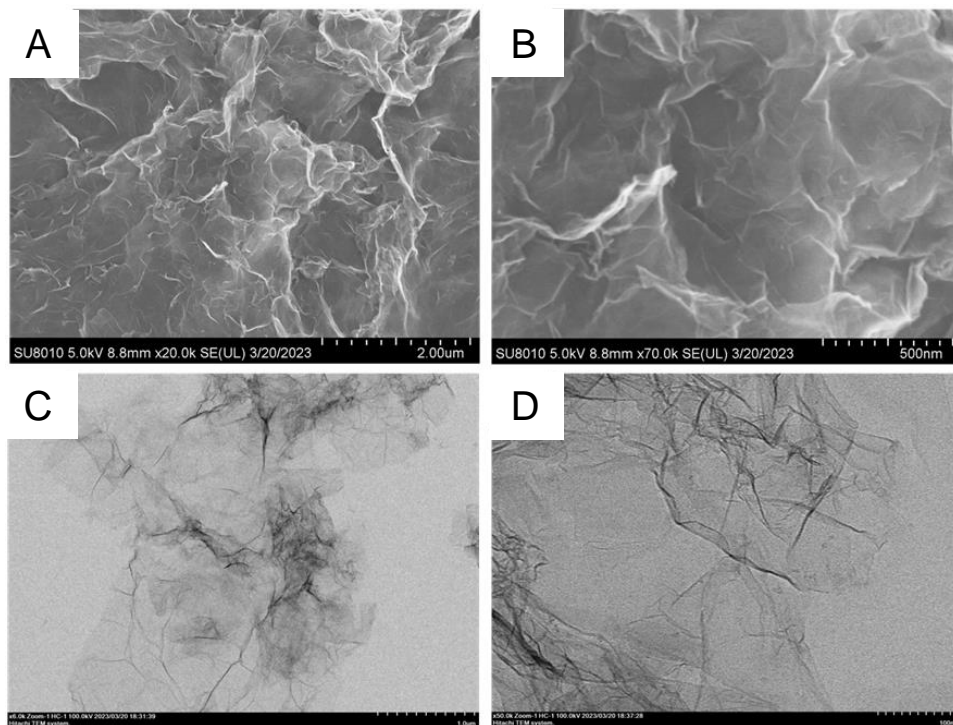

**Fig. S9.** SEM (A, B) and TEM (C, D) images of FePc-rGO at different resolutions.

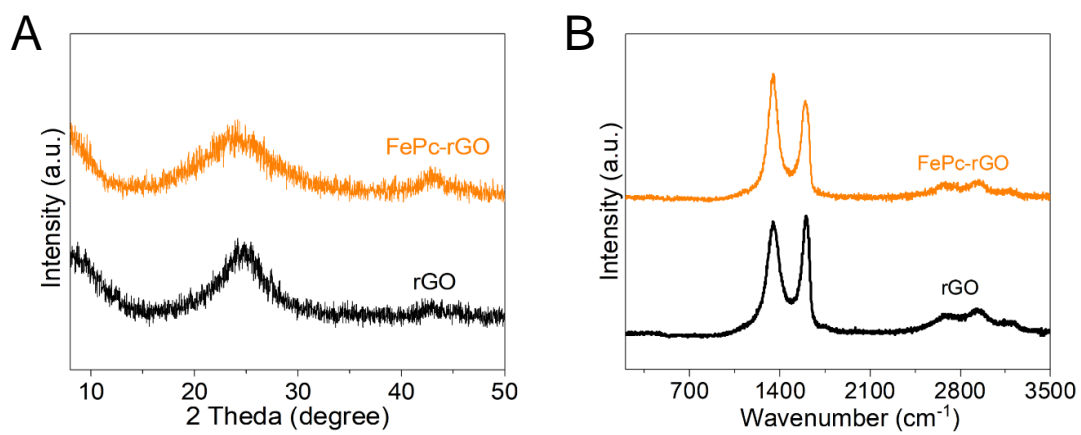

**Fig. S10.** XRD patterns (A) and Raman spectra (B) of rGO and FePc-rGO.

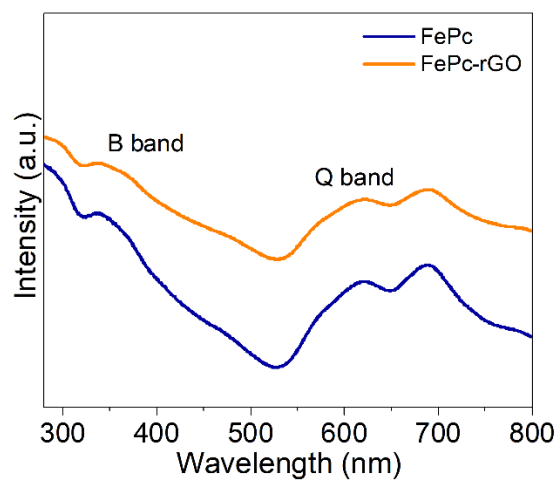

**Fig. S11.** UV-vis spectra of FePc and FePc-rGO in DMF.

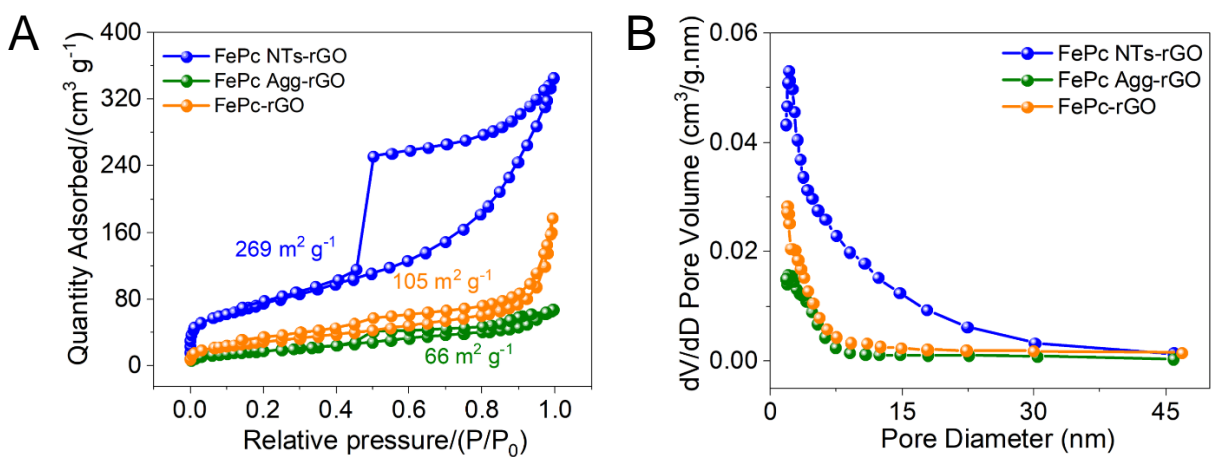

**Fig. S12.** (A) N<sub>2</sub> adsorption/desorption isotherms of FePc NTs-rGO, FePc Agg-rGO and FePc-rGO collected at 77 K and (B) corresponding pore size distribution.

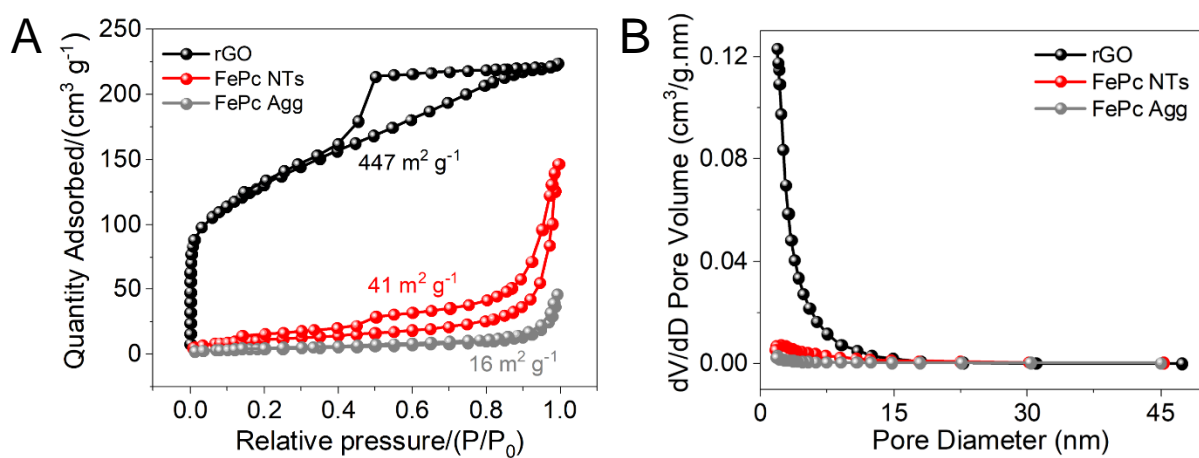

**Fig. S13.** (A) N<sub>2</sub> adsorption/desorption isotherms of rGO, FePc NTs and FePc Agg collected at 77 K and (B) corresponding pore size distribution.

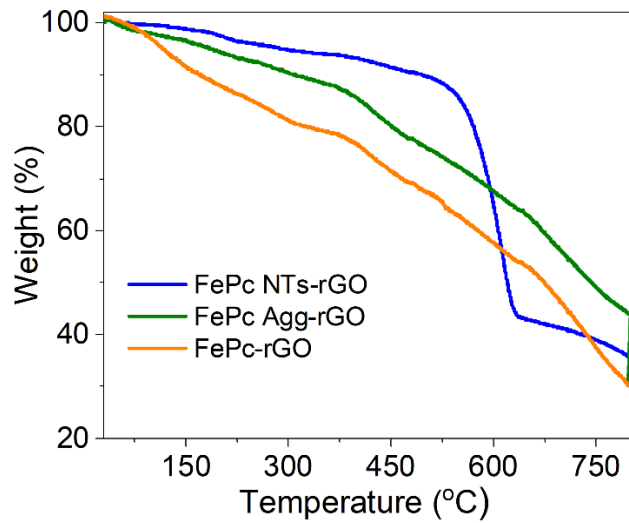

**Fig. S14.** Thermogravimetric analysis of FePc NTs-rGO, FePc Agg-rGO and FePc-rGO under N<sub>2</sub> atmosphere.

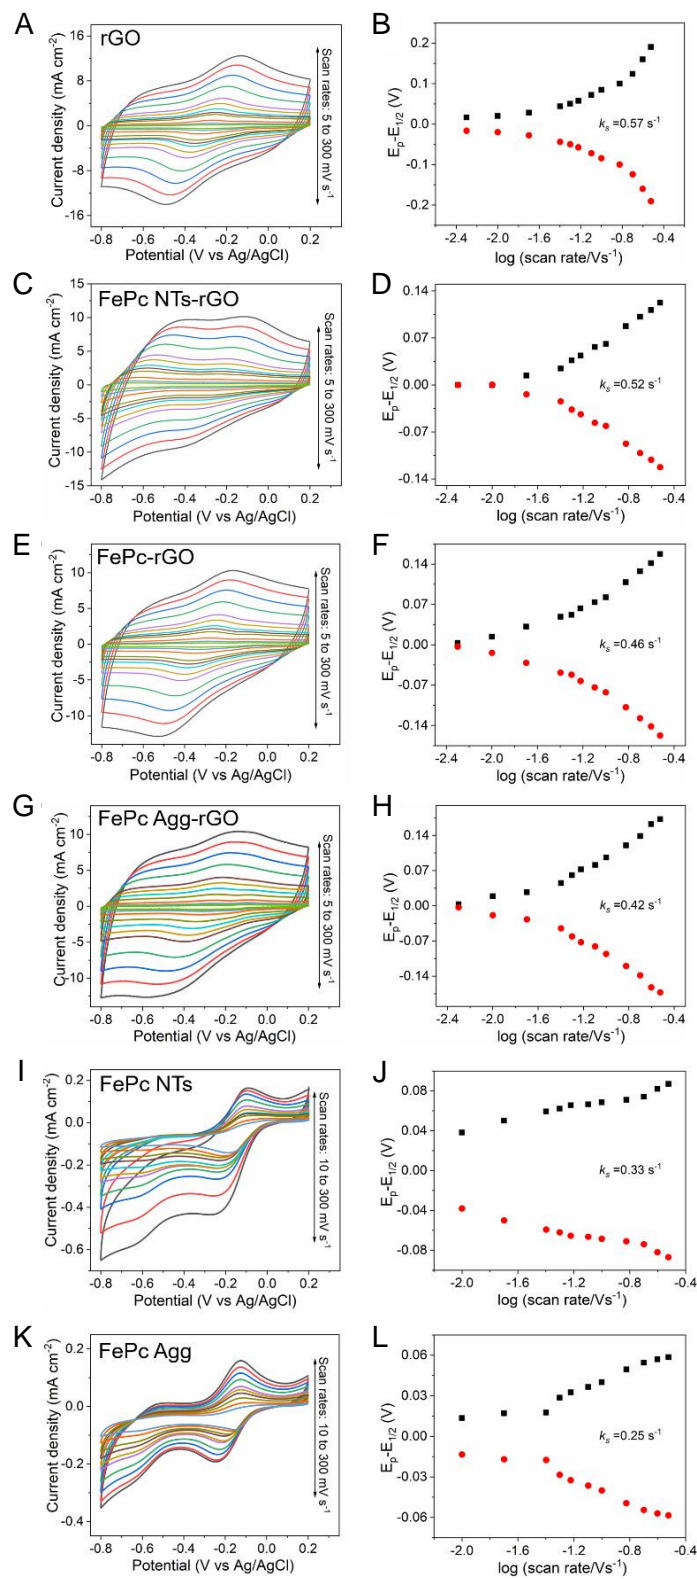

**Fig. S15.** CVs (left column) of various samples conducted in 1 mM Ru(NH<sub>3</sub>)<sub>6</sub>Cl<sub>3</sub>/0.1 M KCl with various scan rates, and the corresponding Laviron analytical results (right column).

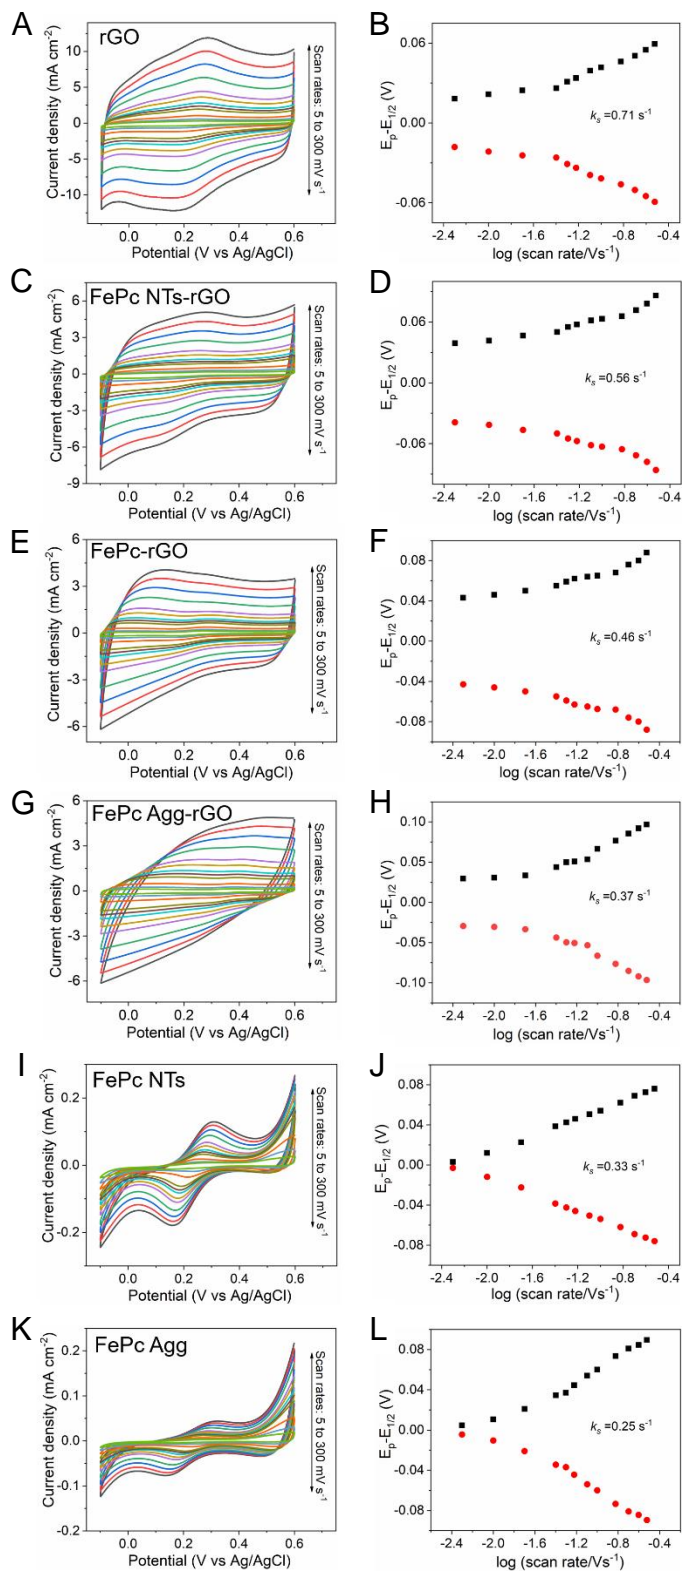

**Fig. S16.** CVs (left column) of various samples conducted in 1 mM  $\text{K}_3\text{Fe}(\text{CN})_6/0.1$  M KCl with various scan rates, and the corresponding Laviron analytical results (right column).



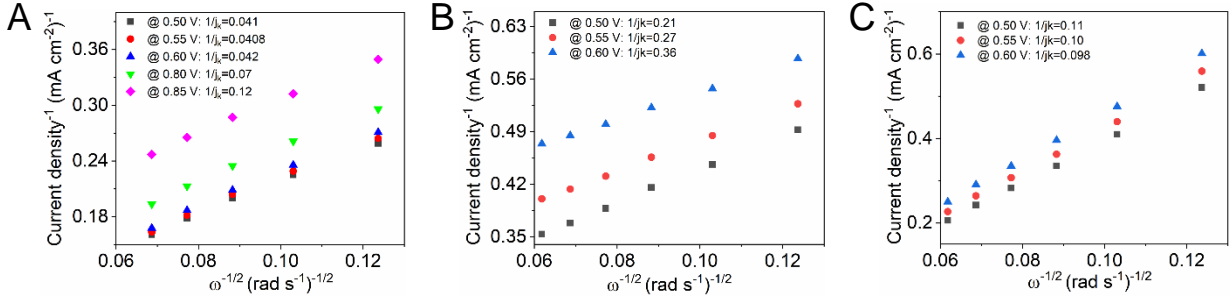

**Fig. S17.** Koutecky-Levich plots of FePc NTs-rGO (A), FePc Agg-rGO (B) and FePc-rGO (C). The data were recorded in O<sub>2</sub> saturated 0.1 M KOH.

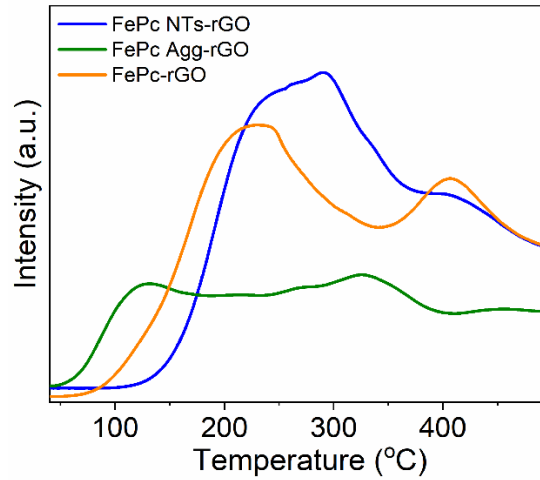

**Fig. S18.** Temperature programmed desorption curves of O<sub>2</sub> for various samples.

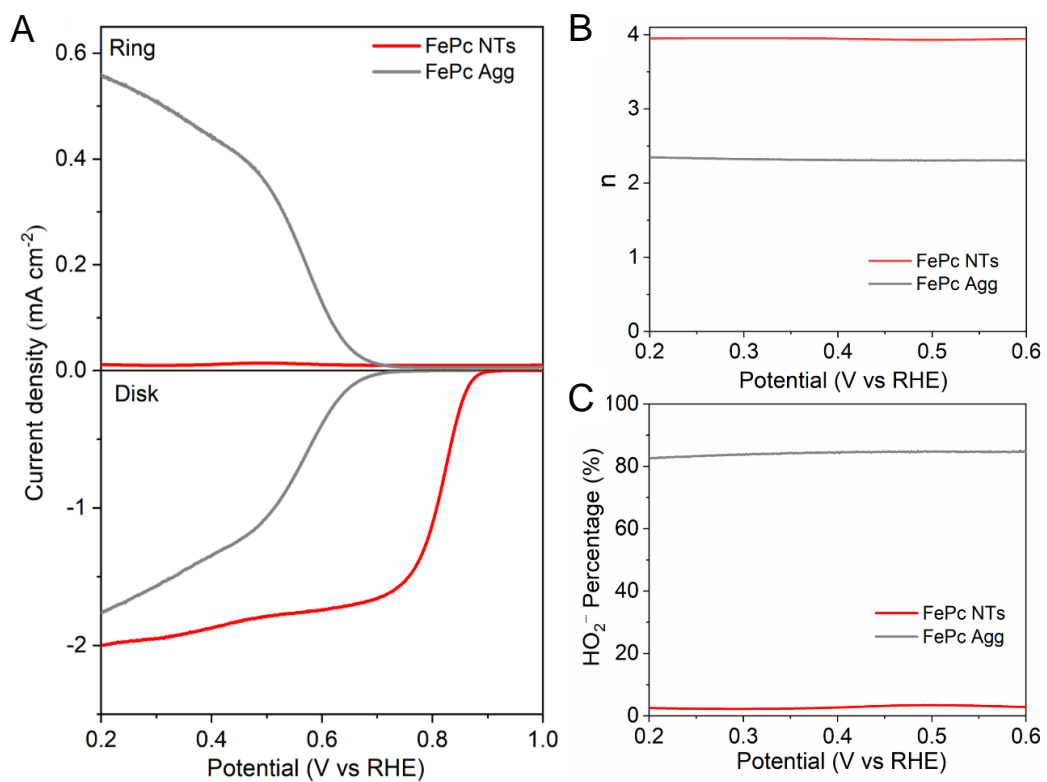

**Fig. S19.** (A) RRDE measurements recorded with FePc NTs and FePc Agg in O<sub>2</sub> saturated 0.1 M KOH, 1600 rpm, 10 mV s<sup>-1</sup>. Corresponding n values (B) and HO<sub>2</sub><sup>-</sup> percentage (C) of ORR derived from the RRDE data.

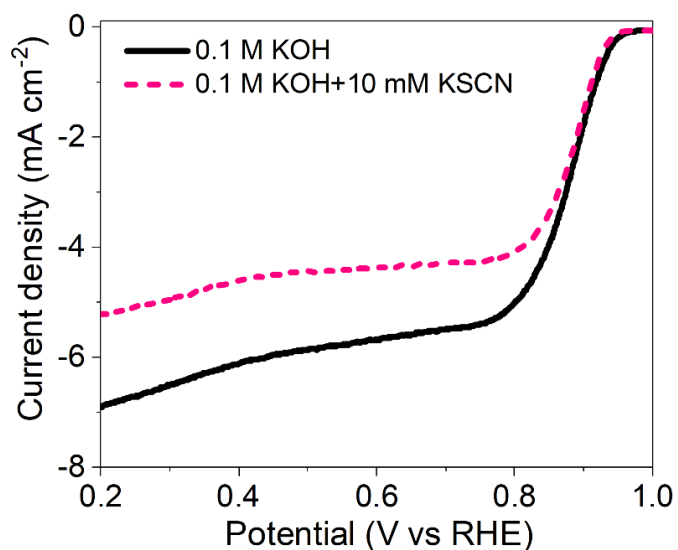

**Fig. S20.** LSVs of FePc NTs-rGO in O<sub>2</sub> saturated 0.1 M KOH with and without adding 10 mM of KSCN at a rotation speed of 1600 rpm.

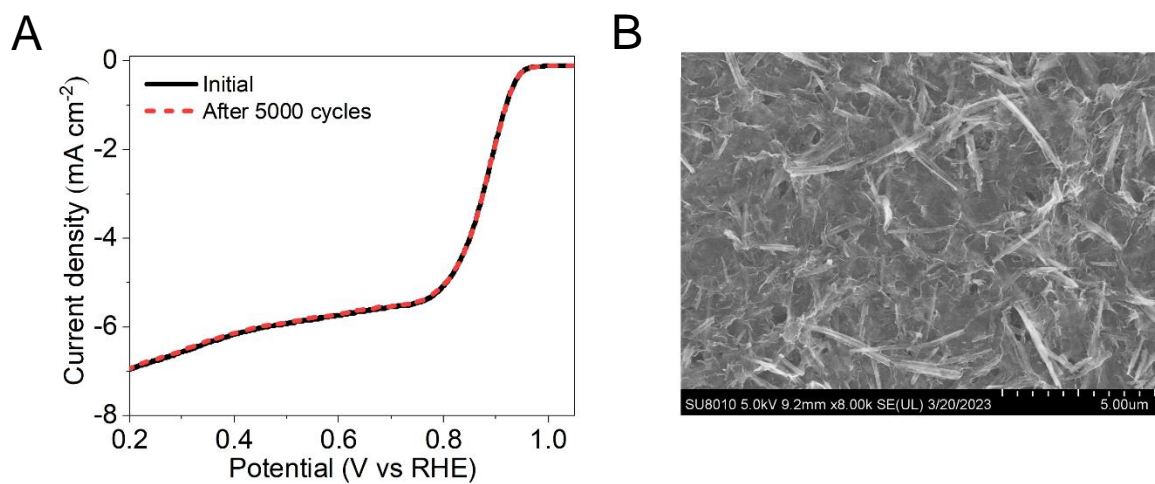

**Fig. S21.** (A) LSVs of FePc NTs-rGO before and after 5000 cycles in O<sub>2</sub> saturated 0.1 M KOH at a rotation rate of 1600 rpm. (B) A typical SEM image of FePc NTs-rGO after 5000 ORR cycles.

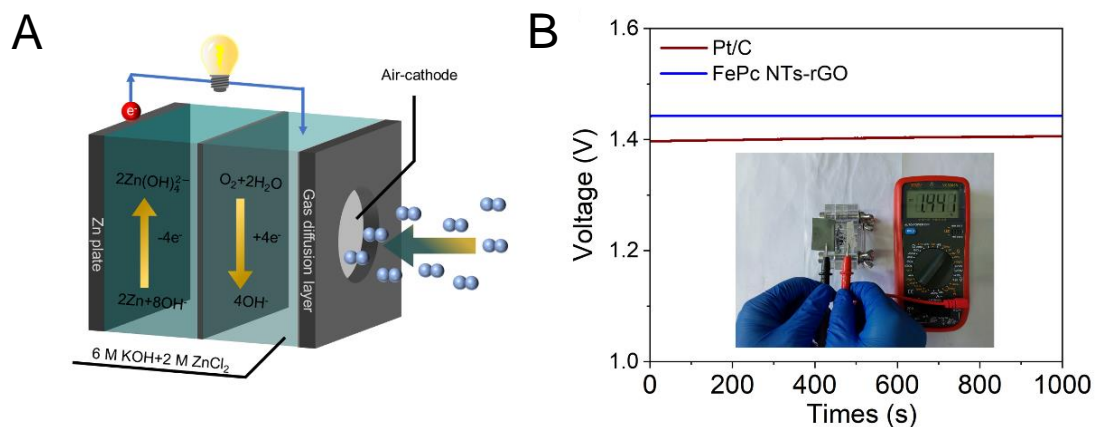

**Fig. S22.** (A) Scheme illustrates a zinc-air battery. (B) OCV of the assembled battery using FePc NTs-rGO as the cathode catalyst compared with the battery using Pt/C catalyst.

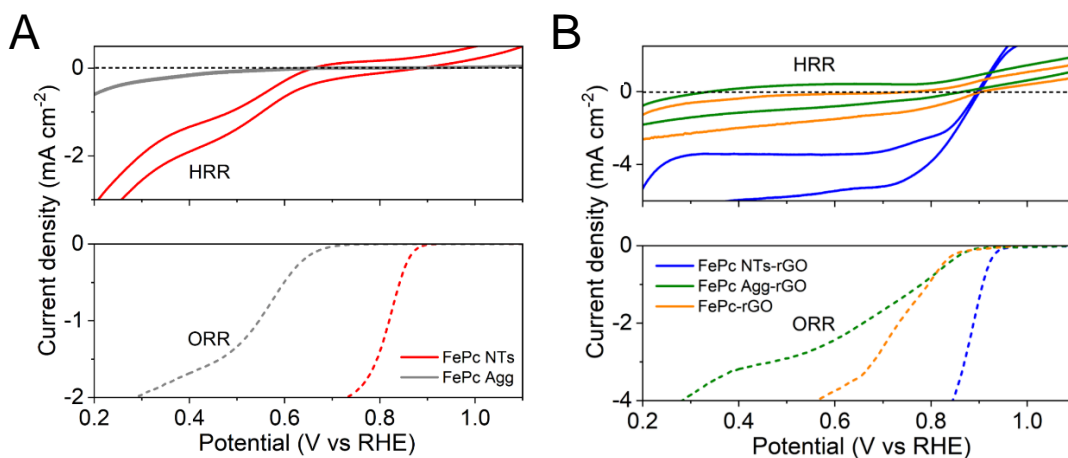

**Fig. S23.** (A) Redox of  $\text{H}_2\text{O}_2$  on the pristine FePc NTs and FePc Agg,  $50 \text{ mV s}^{-1}$ ,  $40 \mu\text{M H}_2\text{O}_2$ ,  $0.1 \text{ M KOH}$ ,  $\text{N}_2$  atmosphere,  $1600 \text{ rpm}$ . (B) Redox of  $\text{H}_2\text{O}_2$  on FePc NTs-rGO, FePc Agg-rGO and FePc-rGO collected at the same condition. The corresponding ORR polarization curves are also included for comparison.

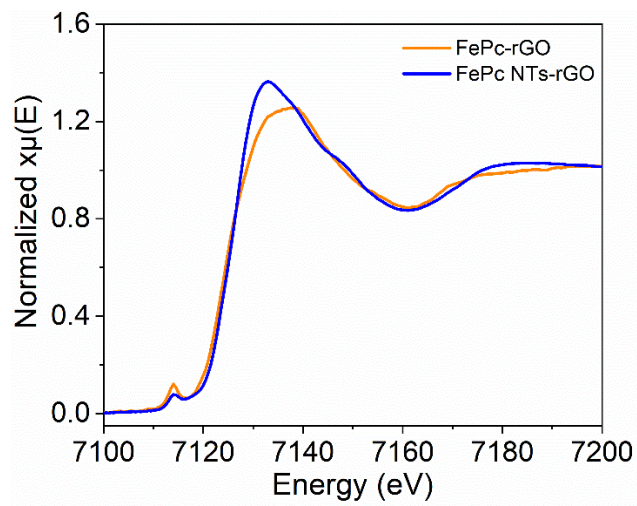

**Fig. S24.** Fe K-edge XANES data of FePc-rGO and FePc NTs-rGO.

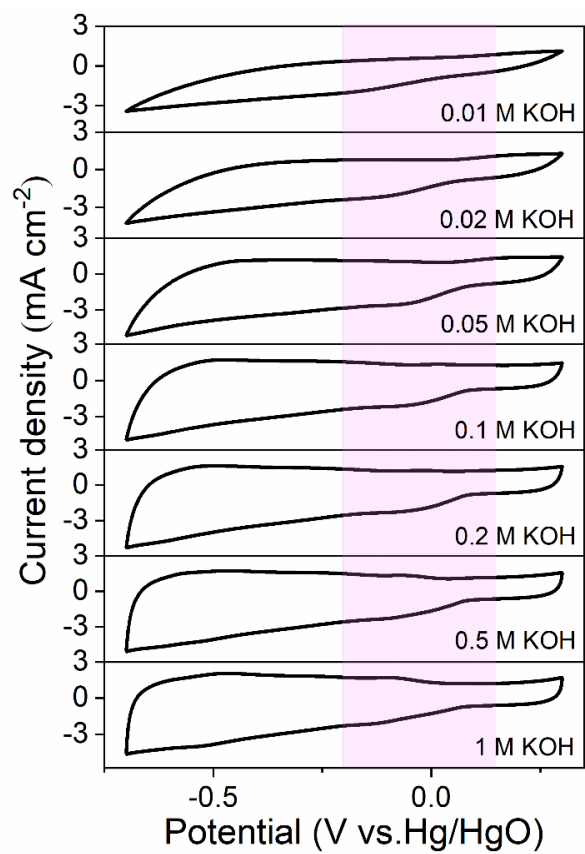

**Fig. S25.** CVs of FePc-rGO in KOH solutions with different pH values at a scan rate of 50 mV s<sup>-1</sup>

1.

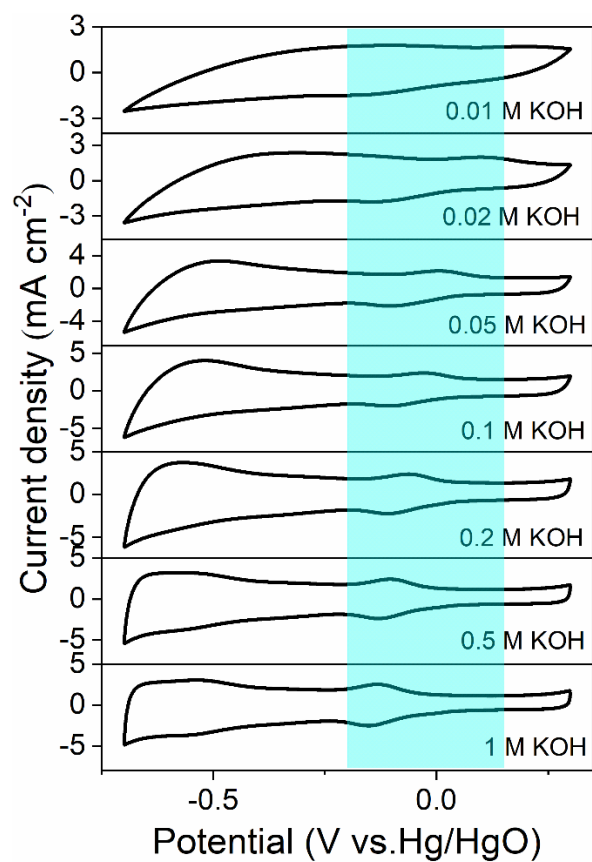

**Fig. S26.** CVs of FePc NTs-rGO in KOH solutions with different pH values at a scan rate of 50 mV s<sup>-1</sup>.

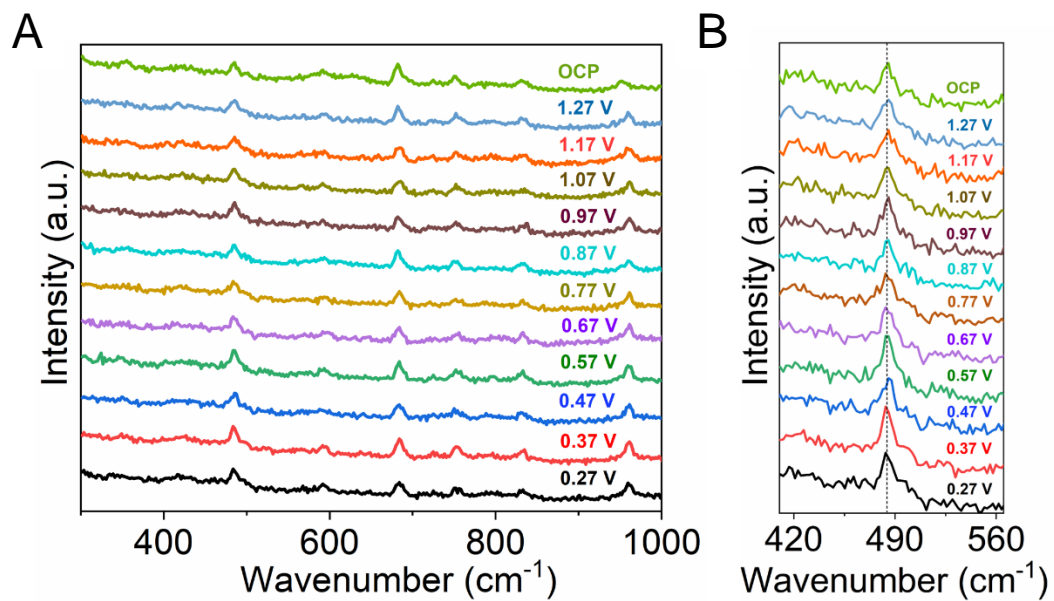

**Fig. S27.** (A) *In situ* Raman electrochemical measurements of FePc NTs-rGO conducted in 0.1 M KOH under O<sub>2</sub> atmosphere. The potentials applied on FePc NTs-rGO ranged from 1.27 V to 0.27 V. (B) The Raman spectra amplified around 591 cm<sup>-1</sup> at the various potentials.



**Table S1.** Fe contents of FePc NTs-rGO, FePc Agg-rGO and FePc-rGO as measured by inductively coupled plasma spectroscopy.

| Samples      | Fe Contents (mol mg <sup>-1</sup> ) |
|--------------|-------------------------------------|
| FePc NTs-rGO | $1.2 \times 10^{-6}$                |
| FePc Agg-rGO | $1.4 \times 10^{-6}$                |
| FePc-rGO     | $0.96 \times 10^{-6}$               |

**Table S2.** Fe contents achieved from the surfaces of FePc NTs-rGO, FePc Agg-rGO and FePc-rGO modified electrodes as measured by inductively coupled plasma spectroscopy.

| Samples      | Fe contents on electrode surfaces (mol cm <sup>-2</sup> ) | Standard deviation (mol cm <sup>-2</sup> ) |
|--------------|-----------------------------------------------------------|--------------------------------------------|
| FePc NTs-rGO | $8.9 \times 10^{-8}$                                      | $1.5 \times 10^{-8}$                       |
| FePc Agg-rGO | $8.2 \times 10^{-8}$                                      | $4.1 \times 10^{-9}$                       |
| FePc-rGO     | $7.1 \times 10^{-8}$                                      | $8.4 \times 10^{-9}$                       |

In the above measurements, FePc NTs-rGO, FePc-rGO and FePc Agg-rGO modified carbon electrodes (5 mm in diameter) were directly immersed into concentrated nitric acid for 10 min and diluted by addition of Millipore water for the ICP measurements.<sup>7</sup> The electrodes remained in the Teflon holders during the acid digestion to ensure that only the electrochemically relevant surface was analyzed. The contribution of Fe impurities from acid were excluded.

## References

- (1) Mortensen, J. J.; Hansen, L. B.; Jacobsen, K. W. Real-space grid implementation of the projector augmented wave method. *Phys. Rev. B* **2005**, *71*, 035109.
- (2) Bahn, S. R.; Jacobsen, K. W. An object-oriented scripting interface to a legacy electronic structure code. *Comput. Sci. Eng.* **2002**, *4*, 56-66.
- (3) Wellendorff, J.; Lundgaard, K. T.; Møgelhøj, A.; Petzold, V.; Landis, D. D.; Nørskov, J. K.; Bligaard, T.; Jacobsen, K. W. Density functionals for surface science: Exchange-correlation model development with Bayesian error estimation. *Phys. Rev. B* **2012**, *85*, 235149.
- (4) Nørskov, J. K.; Rossmeisl, J.; Logadottir, A.; Lindqvist, L.; Kitchin, J. R.; Bligaard, T.; Jónsson, H. Origin of the Overpotential for Oxygen Reduction at a Fuel-Cell Cathode. *J. Phys. Chem. B* **2004**, *108*, 17886-17892.
- (5) Wan, H.; Østergaard, T. M.; Arnarson, L.; Rossmeisl, J. Climbing the 3D Volcano for the Oxygen Reduction Reaction Using Porphyrin Motifs. *ACS Sustainable Chem. Eng.* **2019**, *7*, 611-617.
- (6) Back, S.; Kulkarni, A. R.; Siahrostami, S. Single Metal Atoms Anchored in Two-Dimensional Materials: Bifunctional Catalysts for Fuel Cell Applications. *ChemCatChem* **2018**, *10*, 3034-3039.
- (7) Oh, S.; Gallagher, J. R.; Miller, J. T.; Surendranath, Y. Graphite-Conjugated Rhenium Catalysts for Carbon Dioxide Reduction. *J. Am. Chem. Soc.* **2016**, *138*, 1820-1823.
